# Supplementary material
Source: Springer Nature journal article supplement (https://www.springermedizin.de/resource/supplementary/12889_2012_5051_MOESM1_ESM.pdf/9494606)
Supplement: MOESM1 [file 9494606]

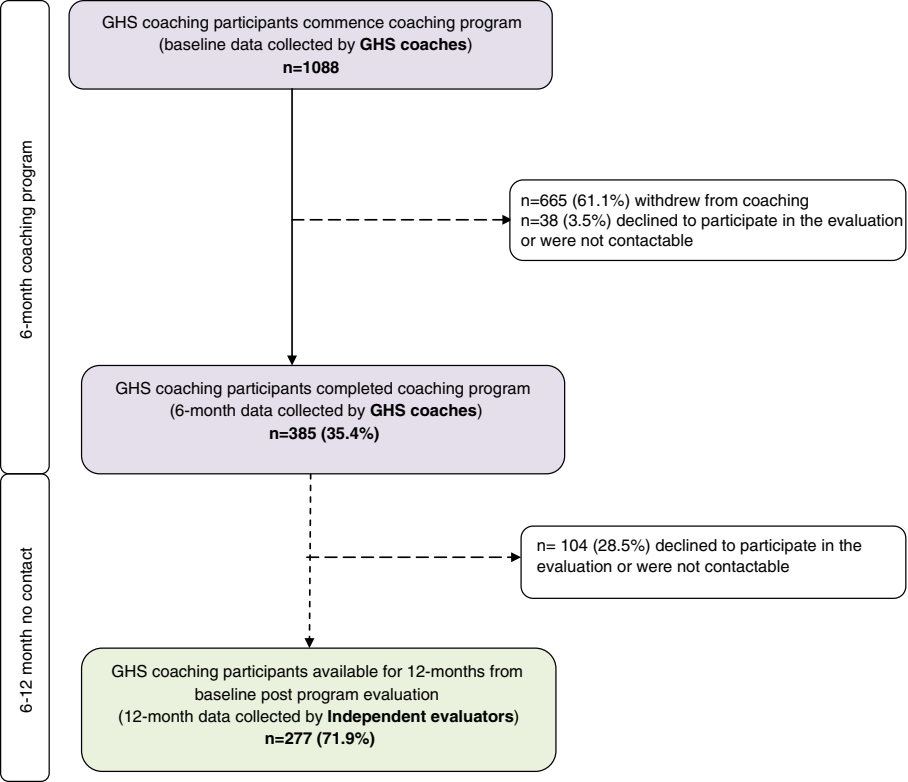

GHS coaching participants commence coaching program  
(baseline data collected by **GHS coaches**)  
**n=1088**

n=665 (61.1%) withdrew from coaching  
n=38 (3.5%) declined to participate in the evaluation  
or were not contactable

GHS coaching participants completed coaching program  
(6-month data collected by **GHS coaches**)  
**n=385 (35.4%)**

n= 104 (28.5%) declined to participate in the  
evaluation or were not contactable

GHS coaching participants available for 12-months from  
baseline post program evaluation  
(12-month data collected by **Independent evaluators**)  
**n=277 (71.9%)**

6-month coaching program

6-12 month no contact
